# Supplementary material for: Identification and Validation of Quantitative Trait Loci Mapping for Spike-Layer Uniformity in Wheat
Source: MDPI journal article supplement (doi:10.3390/ijms23031052), 2022-01-19
Supplement: s1 [file s1]

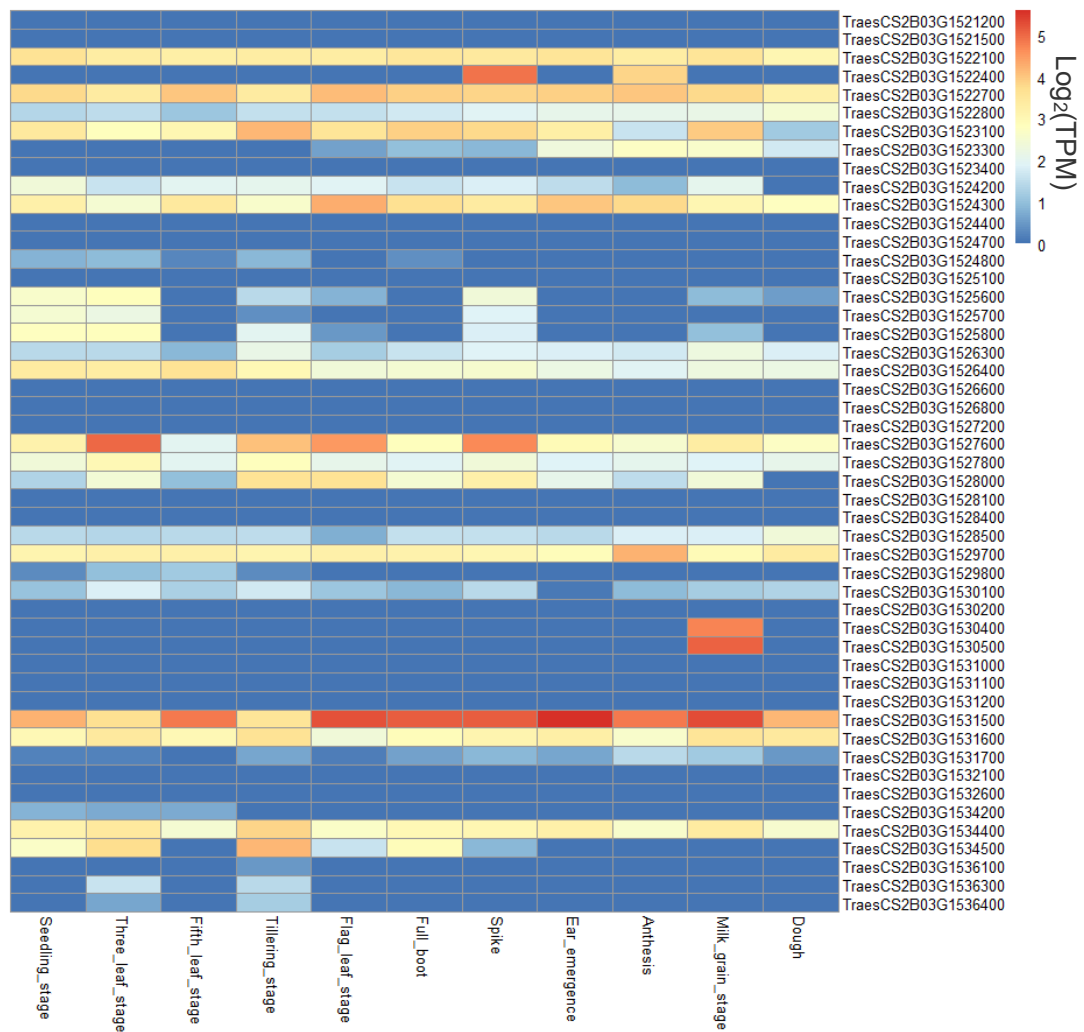

**Supplementary Figure S1** Heat map of in silico gene expression analysis for predicted genes in the interval of *Qslu.sicau-2B-2*. The RNA-seq expression data of these predicted genes are from the wheat expression browser (<http://www.wheat-expression.com/>).

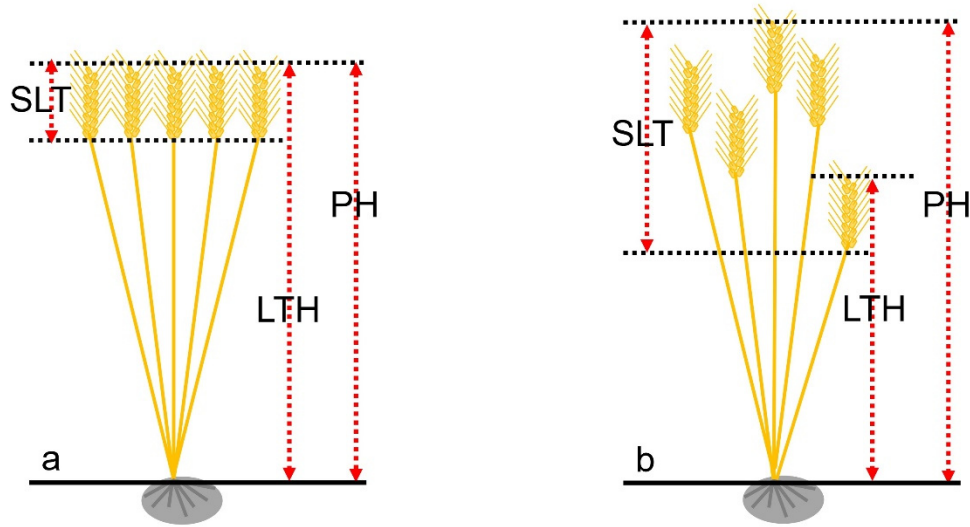

**Supplementary Figure S2** The intuitional visualization of the phenotype was investigated in this study. Spike-layer thickness (SLT) was calculated as  $PH - LTH + SL$ . Each line's spike-layer uniformity (SLU) was calculated as  $SL / (PH - LTH + SL)$ . **(a)** The plant sample shows that the most consistent spikes are distributed in the vertical space (SLU=1). All tillers have the same height, indicating that LTH equals PH. **(b)** The plant sample shows inconsistent spikes are distributed in the vertical space ( $0 < SLU < 1$ ). Note: LTH, lowest tiller height; PH, plant height, SL, spike length.
