# Supplementary material for: Identification and Validation of Quantitative Trait Loci Mapping for Spike-Layer Uniformity in Wheat
Source: Int J Mol Sci. 2022 Jan 19;23(3):1052. doi: 10.3390/ijms23031052 (PMC8835109; doi:10.3390/ijms23031052)
Supplement: Supplementary file 1 [file ijms-23-01052-s001.zip › Supplementary Tables.xlsx]

## Sheet: Table S1
Table S1. The correlation coefficient of spike-layer uniformity among different environments.
Environmenta	WJ2019b	CZ2020	WJ2020	BLUPc
CZ2019	0.79**	0.70**	0.67**	0.91**
WJ2019		0.63**	0.72**	0.91**
CZ2020			0.62**	0.83**
WJ2020				0.85**
a CZ2019, WJ2019, CZ2020, and WJ2020 denote field experiments in Chongzhou (2019, 2020) and Wenjiang (2019, 2020). b **, Significant at P < 0.01. c BLUP, best linear unbiased prediction.

## Sheet: Table S2
Table S2. The list of candidate genes in the interval of QSlu.sicau-2B-2.
Wheat Gene ID	Physical location (bp)	Rice gene ID	Functional annotations
TraesCS2B03G1522100	798635866-798650173	Os04g0683100	Cleavage and polyadenylation specificity factor subunit 5
TraesCS2B03G1522700	798770194-798781692	Os04g0682800	Glutathione-regulated potassium-efflux system protein
TraesCS2B03G1524300	799377586-799380085	Os03g0583800	Peroxisomal membrane (Mpv17/PMP22) family protein
TraesCS2B03G1526400	799806309-799810016	Os03g0655700	3-isopropylmalate dehydrogenase
TraesCS2B03G1529700	800569861-800573288	Os04g0687300	Chaperone protein DnaJ
TraesCS2B03G1531500	800876216-800877611	Os02g0567100	Thioredoxin
TraesCS2B03G1531600	800878675-800880559	Os03g0385900	30S ribosomal protein S11
TraesCS2B03G1534400	801597581-801600710	Os04g0692800	Prenylcysteine oxidase / farnesylcysteine lyase

## Sheet: Table S3
Table S3. Quantitative trait loci for yield-related and morpho-physiological traits identified using BLUP values.
QTL	Traita	Chromosome	Genetic distance (cM)	Flanking marker	LODb	PVE (%)c	AEd
QLth.sicau-2A	LTH	2A	222.01–223.09	AX-110636519 and AX-110049660	3.7851	2.8935	-1.683
QLth.sicau-2B		2B	26.1–49.22	AX-110426897 and AX-111193580	3.9272	4.8976	2.1976
QLth.sicau-2D		2D	45.08–56.14	AX-111696354 and AX-111956072	18.0401	15.5019	-3.8942
QLth.sicau-4A		4A	40.71–46.57	AX-109821994 and AX-109449898	7.6958	6.445	-2.5221
QLth.sicau-5A		5A	108.94–109.29	AX-108919719 and AX-108729500	10.1527	8.1231	-2.8327
QLth.sicau-5B		5B	91.57–92.09	AX-108875349 and AX-110369150	3.6233	2.7648	-1.6468
QLth.sicau-6B		6B	61.65–62.01	AX-94731858 and AX-110386085	3.0124	2.2801	1.5012
QLth.sicau-7D		7D	97.69–103.49	AX-111061288 and AX-109352158	4.5163	3.5344	1.8597
QPh.sicau-1B	PH	1B	0.57–6.52	AX-109980661 and AX-110562552	3.6011	2.2033	-1.7108
QPh.sicau-2A		2A	222.01–223.09	AX-110636519 and AX-110049660	5.5103	3.1536	-2.0258
QPh.sicau-2D-1		2D	45.08–56.14	AX-111696354 and AX-111956072	11.2699	7.2424	-3.0685
QPh.sicau-2D-2		2D	144.97–146.22	AX-109421761 and AX-111497459	4.1946	2.3746	-1.7588
QPh.sicau-3A		3A	70.87–71.05	AX-108981333 and AX-109035069	6.6683	3.8499	-2.2548
QPh.sicau-4A-1		4A	46.57–48	AX-109449898 and AX-111565010	8.1927	4.8107	-2.511
QPh.sicau-4A-2		4A	114.73–117.27	AX-111479307 and AX-110497944	3.6802	2.1222	-1.6613
QPh.sicau-5A-1		5A	108.94–109.29	AX-108919719 and AX-108729500	25.5649	17.2072	-4.7532
QPh.sicau-5A-2		5A	116.53–120.83	AX-110121838 and AX-109818688	8.2857	4.9324	2.5533
QSl.sicau-1B	SL	1B	18.11–30.47	AX-111039704 and AX-109904511	3.5839	3.263	0.2696
QSl.sicau-1D		1D	56.5–57.22	AX-95260306 and AX-111972540	4.0761	2.9965	0.2575
QSl.sicau-2A		2A	205.64–206.35	AX-109017467 and AX-109576757	6.9089	5.1928	0.3384
QSl.sicau-2B-1		2B	137.91–139.55	AX-111487903 and AX-111457622	5.5589	4.1407	-0.3039
QSl.sicau-2B-2		2B	165.7–166.4	AX-108770043 and AX-108927717	10.2551	7.7483	0.4142
QSl.sicau-2D		2D	222.96–229.64	AX-109316972 and AX-110906716	4.3205	3.2671	0.2696
QSl.sicau-3B		3B	42.97–43.15	AX-110596014 and AX-111035325	4.0751	2.9404	0.2573
QSl.sicau-4A		4A	53.85–54.03	AX-111666382 and AX-110678848	5.6194	4.1241	0.3035
QSl.sicau-5A		5A	108.94–109.29	AX-108919719 and AX-108729500	13.9645	10.9179	-0.4929
QSl.sicau-5D		5D	19.4–22.13	AX-89538469 and AX-110580874	3.5418	2.6206	0.2404
QSlT.sicau-1A	SLT	1A	46.44–47.37	AX-108954549 and AX-111097762	3.3239	3.7165	-0.7809
QSlT.sicau-2B		2B	162.32–163.57	AX-109345580 and AX-111500175	4.4206	5.0266	-0.9083
QSlT.sicau-2D		2D	230.67–231.02	AX-110440599 and AX-95093952	3.0298	3.3144	-0.742
QSlT.sicau-3A		3A	65.66–66.01	AX-111649831 and AX-111620832	7.0945	8.0081	-1.1481
QSlT.sicau-3D		3D	62.72–64.52	AX-108731997 and AX-110824500	3.2229	3.6047	-0.7686
a LTH, lowest tiller height; PH, plant height; SL, spike length; SLT, spike-layer thickness. b LOD, logarithm of odds score. c PVE, the percentage of phenotypic variance explained by individual QTL. d AE, additive effect. Positive values mean alleles from H461 increase the trait scores, and negative values mean alleles from Chinese Spring increase the trait scores.

## Sheet: Table S4
Table S4. The four trials' plant dates and meteorological data, including temperature and rainfall.
Trial	Planting date	Average temperature (℃)							Average rainfall (mm)
		Nov	Dec	Jan	Feb	Mar	Apr	May	Nov	Dec	Jan	Feb	Mar	Apr	May
CZ2019 (2018-2019)	24-Oct-2018	12.07	7.32	6.67	8.74	13.69	21.27	21.17	15.66	20.64	13.8	18.29	18.41	56.99	109.34
WJ2019 (2018-2019)	29-Oct-2018	11.41	6.54	5.98	7.51	12.33	19.21	19.93	6.6	20.32	9.4	13.97	38.61	50.8	126.49
CZ2020 (2019-2020)	26-Oct-2019	13.03	8.77	7.9	10.22	15.25	17.52	24.58	27.38	5.12	20.6	15.18	25.18	39.68	83.99
WJ2020 (2019-2020)	04-Nov-2019	12.06	8.25	7.27	10.04	13.81	16.19	22.75	21.59	4.83	2.29	4.83	29.46	25.91	59.44
